# Supplementary material for: Enhanced corrosion protection and biocompatibility of a PLGA–silane coating on AZ31 Mg alloy for orthopaedic applications
Source: Royal Society of Chemistry journal article supplement (doi:10.1039/c6ra24382g), 2016-01-01
Supplement: c6ra24382g1.pdf [file c6ra24382g1.pdf]

## Electronic Supplementary Information

### Enhanced corrosion protection and biocompatibility of PLGA-Silane coating on AZ31 Mg alloy for orthopaedic applications

*Sankalp Agarwal<sup>1,2</sup>, Muhammad Morshed<sup>1</sup>, Marie-Noelle Labour<sup>3</sup>, David Hoey<sup>3</sup>, Brendan Duffy<sup>1</sup>, James Curtin<sup>2</sup>, Swarna Jaiswal<sup>1</sup>\**

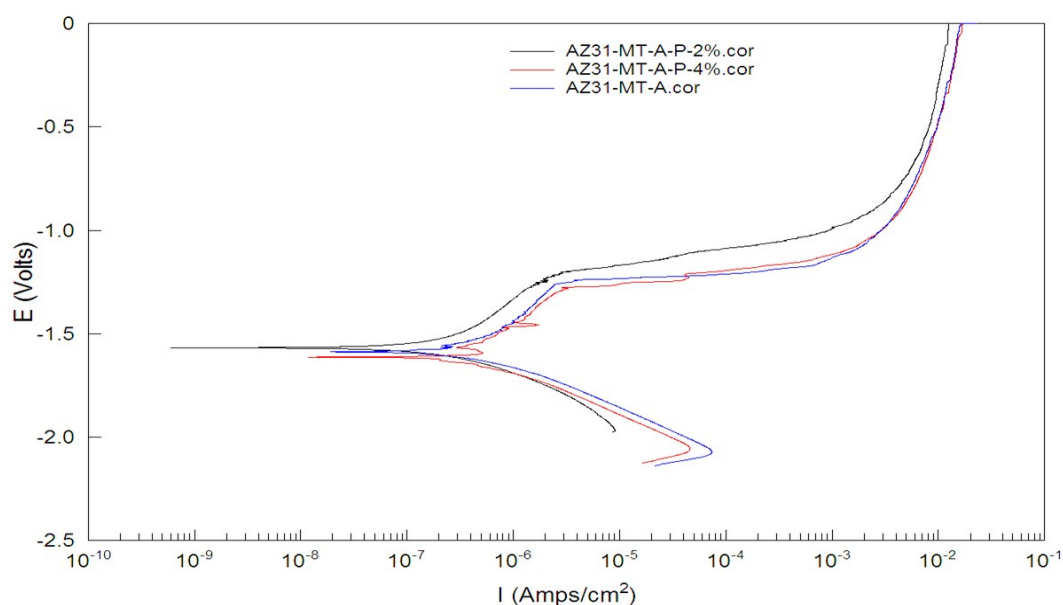

**Fig SI 1-** Potentiodynamic polarisation curves of modified AZ31 substrate

From the PDS curves, it can be observed that the 4% PLGA coated substrates (AZ31-MT-A-P-4 %) showed lower corrosion resistance with negative shift of  $E_{\text{corr}}$  to -1.602 V and increase in current density 0.28 A/cm<sup>2</sup> as compared 2% PLGA coated substrates (AZ31-MT-A-P-2%).

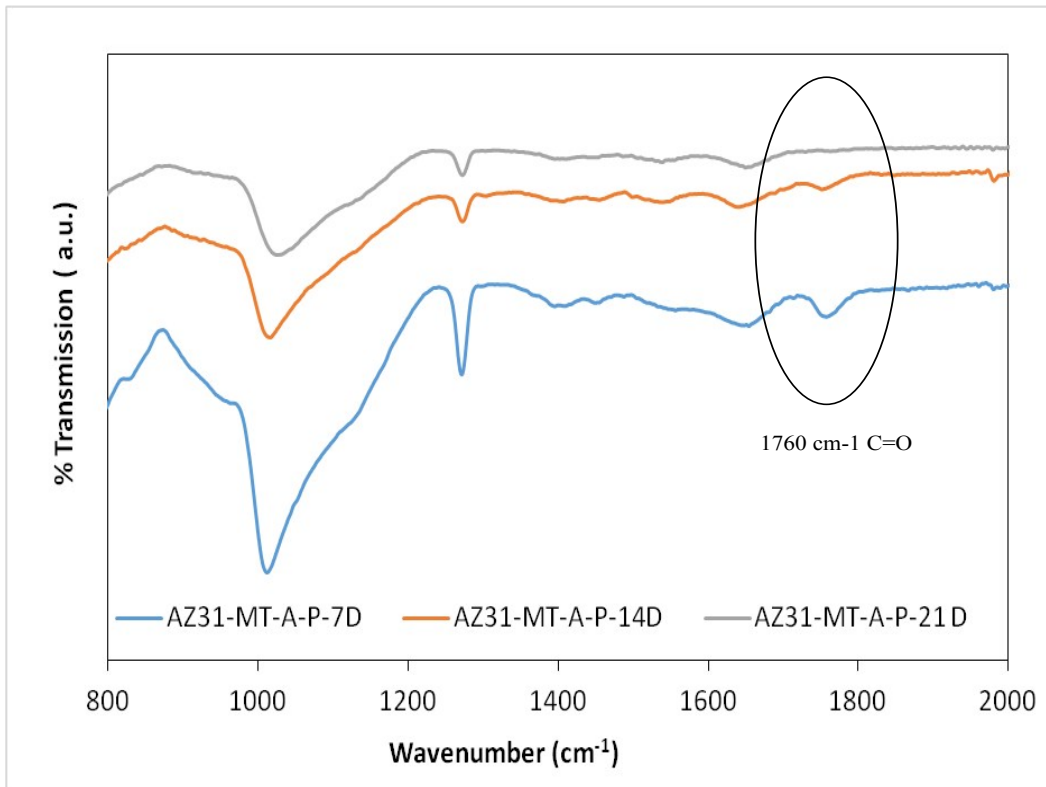

**Fig SI 2-** ATR-IR of aged AZ31-MT-A-P substrate in DMEM for 7, 14, and 21 days
